# Supplementary material
Source: HighWire-hosted journal article supplement (https://tsaco.bmj.com/content/8/1/e001074)
Supplement: inline-supplementary-material-1 [file inline-supplementary-material-1.pdf]

## The Effect of Valproic Acid upon Skeletal Muscle Subjected to Prolonged Tourniquet Application

Moritz RJ et al.

Trauma Surgery and Acute Care Open

Dec 2022

- Valproic acid treatment has been shown to improve outcomes in ischemia-based injuries
- Prolonged tourniquet application creates ischemia and significant morbidity
- Future military landscapes may not guarantee rapid evacuation requiring extended tourniquet applications for hemorrhage control

Three hour tourniquet application in a rat hemorrhage model with Valproic acid treatment

- Pro-survival pAkt signaling in muscle was significantly improved with treatment
- Systemic pro-inflammatory cytokines were significantly reduced
- Glomerular filtration rate decrements were significantly improved
- These findings did not translate into improved limb function post-injury
